# Supplementary material for: Morphology, Palynology and Molecular Phylogeny of Barleria cristata L. (Acanthaceae) Morphotypes from India
Source: MDPI journal article supplement (doi:10.3390/d14080677), 2022-08-19
Supplement: s1 [file s1]

**Table S1.** Details of species included in phylogenetic analysis

| Taxa                                           | Voucher ID                                     | GenBank Accession Numbers |                           |                                            |
|------------------------------------------------|------------------------------------------------|---------------------------|---------------------------|--------------------------------------------|
|                                                |                                                | ITS                       | <i>trnS</i> - <i>trnG</i> | <i>ndhF</i> - <i>trnL</i> <sub>(UAG)</sub> |
| <i>Barleria acanthoides</i> Vahl               | Boulos & al. 16678 (E)                         | MK066127                  | MK066177                  | MK089855                                   |
| <i>Barleria argentea</i> Balf.f.               | Tripp & Kelbessa 896 (RSA)                     | MK066128                  | MK066178                  | MK089856                                   |
| <i>Barleria argillicola</i> Oberm              | Balkwill, McDade, Balkwill, Goyder 11655 (J)   | MK066129                  | MK066179                  | MK089857                                   |
| <i>Barleria aristata</i> I.Darbysh             | Carter, S. & al. 2272                          | MK079656                  | MK066173                  | MK089858                                   |
| <i>Barleria aucheriana</i> Nees                | Miller, A.G. 7651                              | MK066130                  | MK066180                  | MK089859                                   |
| <i>Barleria baluganii</i> Ensermu              | Tripp 915 (RSA)                                | MK066131                  | MK066181                  | MK089860                                   |
| <i>Barleria bispinosa</i> Vahl                 | Wood, J.R.I. 1371                              | MK066132                  | MK066182                  | MK089861                                   |
| <i>Barleria boehmii</i> Lindau                 | Bidgood, S. & al. 7679                         | MK066133                  | MK066183                  | MK089862                                   |
| <i>Barleria bolusii</i> Oberm                  | McDade 1298 (J)                                | MK066134                  | MK066184                  | MK089863                                   |
| <i>Barleria bremekampii</i> Oberm              | McDade 1303 (J)                                | MK066135                  | MK066185                  | MK089864                                   |
| <i>Barleria cristata</i> L.                    | Hu, S.Y. & But, P. 23180                       | -                         | MK066186                  | MK089865                                   |
| <i>Barleria cristata</i> L.                    | BKF189455                                      | KT004472                  | -                         | -                                          |
| <i>Barleria dulcis</i> Benoist                 | Du Puy, B. & al. MB187                         | -                         | MK066224                  | MK089907                                   |
| <i>Barleria</i> sp. aff. <i>dulcis</i> Benoist | Du Puy, Du Puy, Carlson & Andrianantiana MB803 | -                         | MK066187                  | MK089866                                   |
| <i>Barleria grandiflora</i> Dalzell            | Kameswara Rao 85                               | MK066137                  | MK066189                  | MK089868                                   |
| <i>Barleria grandipetala</i> De Wild           | Bidgood & al. 7952                             | MK066138                  | MK066190                  | MK089869                                   |
| <i>Barleria grandis</i> Hochst ex Nees         | Friis, I. & al. 13075                          | MK066139                  | MK066191                  | MK089870                                   |

|                                                       |                                               |          |          |          |
|-------------------------------------------------------|-----------------------------------------------|----------|----------|----------|
| <i>Barleria grootbergensis</i> I.Darbysh. & E.A.Tripp | Tripp & Dexter 1963 (RSA)                     | MK066140 | MK066192 | -        |
| <i>Barleria heterotricha</i> Lindau                   | Tsepang Makolela 2 (J)                        | MK066141 | MK066193 | MK089872 |
| <i>Barleria hildebrandtii</i> S.Moore                 | Thulin, M. & al. 7690                         | MK066142 | MK066194 | MK089873 |
| <i>Barleria involucrata</i> Nees                      | P. Davidar s.n. (Pondicherry University)      | MK066143 | MK066195 | MK089874 |
| <i>Barleria kaloxytana</i> Lindau                     | Tripp & Dexter 824 (RSA)                      | MK066144 | MK066196 | MK089875 |
| <i>Barleria kitchingii</i> Baker                      | Daniel 10415 (CAS)                            | MK066145 | MK066197 | MK089876 |
| <i>Barleria lancifolia</i> T.Anderson                 | Balkwill, McDade, Balkwill, Goyder 11664 (J). | MK066146 | MK066198 | MK089877 |
| <i>Barleria leandrii</i> Benoist                      | Labat & Deroin 2304                           | MK066147 | MK066199 | MK089878 |
| <i>Barleria limnogeton</i> S.Moore                    | Bidgood, S. & al. 7094                        | MK079657 | MK066174 | MK089879 |
| <i>Barleria lupulina</i> Lindl                        | Daniel 10469 (CAS)                            | MK066149 | MK066201 | MK089881 |
| <i>Barleria lupulina</i> Lindl                        | McDade s.n. (J)                               | MK066150 | MK066202 | -        |
| <i>Barleria mackenii</i> Hook.f                       | Tripp 786 (RSA)                               | MK066151 | MK066203 | MK089882 |
| <i>Barleria maclaudii</i> Benoist                     | Adam, J.G. 20001                              | MK066152 | MK066204 | MK089883 |
| <i>Barleria meeuseana</i> P.G.Mey                     | Tripp & Dexter 1953 (RSA)                     | MK066153 | MK066205 | MK089884 |
| <i>Barleria meeuseana</i> P.G.Mey                     | Tripp 4069 (RSA)                              | -        | -        | MK089899 |
| <i>Barleria merxmuelleri</i> P.G.Mey                  | Tripp 4097 (RSA)                              | MK066163 | -        | MK089900 |
| <i>Barleria meyeriana</i> Nees                        | McDade & Balkwill 1245 (J)                    | MK066154 | MK066206 | MK089885 |
| <i>Barleria monticola</i> Oberm.                      | Balkwill, McDade & Balkwill 11651 (J)         | -        | MK066207 | MK089886 |
| <i>Barleria mutabilis</i> I.Darbysh                   | Boane, C. 21                                  | MK066136 | MK066188 | MK089867 |
| <i>Barleria nitida</i> Nees                           | Weerasoonya & Samarasinghe 7028 (E).          | MK066155 | MK066208 | MK089887 |

|                                            |                                                     |          |          |          |
|--------------------------------------------|-----------------------------------------------------|----------|----------|----------|
| <i>Barleria obtusa</i> Nees                | Balkwill, McDade,<br>Balkwill, Goyder<br>11654 (J). | MK066156 | MK066209 | MK089888 |
| <i>Barleria oenotheroides</i> Dum.Cours.   | Hammel & al. 26092<br>(RSA).                        | MK079659 | MK066176 | MK089890 |
| <i>Barleria oenotheroides</i> Dum.Cours.   | Darbyshire, I. 592                                  | MK079658 | MK066175 | MK089889 |
| <i>Barleria ovata</i> E.Mey. ex Nees       | Balkwill, Balkwill,<br>Goyder & Paton 10856<br>(J). | MK066157 | MK066210 | MK089891 |
| <i>Barleria parvispina</i> Benoist         | Daniel & al. 10406<br>(CAS)                         | MK066158 | MK066211 | MK089892 |
| <i>Barleria popovii</i> Verdc.             | Miller, A. G 8694                                   | -        | MK066213 | MK089893 |
| <i>Barleria prionitis</i> L.               | L.H. Cramer 4849<br>(BKF)                           | MK066159 | MK066212 | MK089894 |
| <i>Barleria pseudosomalia</i> I.Darbysh.   | Bidgood, S. & al. 1001                              | MK066160 | MK066214 | MK089895 |
| <i>Barleria puberula</i> Benoist           | Phillipson, P.B. & al.<br>4147                      | MK066148 | MK066200 | MK089880 |
| <i>Barleria quadrispina</i> Lindau         | Friis, I. & al. 10719                               | MK066161 | MK066215 | MK089896 |
| <i>Barleria richardsiae</i> I.Darbysh      | Bidgood, S. & al. 5602                              | MK066162 | MK066216 | MK089897 |
| <i>Barleria saxatilis</i> Oberm.           | Balkwill & al. 11669<br>(J).                        | -        | MK066217 | MK089898 |
| <i>Barleria splendens</i> E.A.Bruce        | S. Bidgood & al. 6287                               | MK066164 | MK066218 | MK089901 |
| <i>Barleria strigosa</i> Willd.            | Suddee & al. 857<br>(BKF).                          | MK066165 | MK066219 | MK089902 |
| <i>Barleria subregularis</i> I.Darbysh.    | Bidgood, S. & al. 958                               | MK066166 | MK066220 | MK089903 |
| <i>Barleria taitensis</i> S.Moore.         | McDade 1263 (J).                                    | MK066167 | MK066221 | MK089904 |
| <i>Barleria trispinosa</i> (Forssk.) Vahl  | Friis, I. & al. 10625                               | MK066168 | MK066222 | MK089905 |
| <i>Barleria ventricosa</i> Hochst. ex Nees | Friis, I. & al. 13136                               | MK066169 | MK066223 | MK089906 |
| <i>Barleria whytei</i> S.Moore             | Robertson, A.A. 7623                                | MK066170 | MK066225 | MK089908 |

|                                                                            |                                                     |          |          |          |
|----------------------------------------------------------------------------|-----------------------------------------------------|----------|----------|----------|
| <i>Barleria wilmsiana</i> Lindau                                           | Balkwill, Balkwill,<br>Goyder & Paton 10900<br>(J). | MK066171 | MK066226 | MK089909 |
| <b>Outgroup</b>                                                            |                                                     |          |          |          |
| <i>Crabbea acaulis</i> N.E.Br.                                             | Balkwill & al. 11649<br>(J).                        | EU528885 | EU528953 | MK089910 |
| <i>Crabbea migiurtina</i> (Chiov.) Thulin                                  | Thulin & al. 10665<br>(UPS).                        | EU528888 | EU528959 | MK089911 |
| <i>Crabbea thymifolia</i> (Chiov.) Thulin                                  | Thulin & al. 10650<br>(UPS).                        | EU528874 | EU528939 | MK089854 |
| <i>Lasiocladus villosus</i> Benoist                                        | Daniel 10427 (CAS)                                  | MK066172 | MK066227 | MK089912 |
| <i>Lepidagathis chiapensis</i> Acosta                                      | Daniel 8374 (CAS)                                   | EU528897 | EU528975 | MK089914 |
| <i>Lepidagathis scabra</i> C.B.Clarke                                      | McDade & Balkwill<br>1238 (J).                      | EU528896 | EU528974 | MK089913 |
| <i>Lepidagathis uxpanapensis</i> (Acosta)<br>Kameyama                      | Garcia 539 (ARIZ).                                  | EU528898 | EU528977 | MK089916 |
| <i>Lepidagathis sessilifolia</i> (Pohl)<br>Kameyama ex Wassh. & J.R.I.Wood | Daniel & al. 10106<br>(CAS).                        | -        | EU528976 | MK089915 |
| <i>Schaueriopsis variabilis</i> Champl. &<br>I.Darbysh.                    | Q. Luke 12527 (K).                                  | -        | MK066228 | MK089917 |

---
