# Supplementary material for: Morphology, Palynology and Molecular Phylogeny of Barleria cristata L. (Acanthaceae) Morphotypes from India
Source: MDPI journal article supplement (doi:10.3390/d14080677), 2022-08-19
Supplement: s1 [file s1]

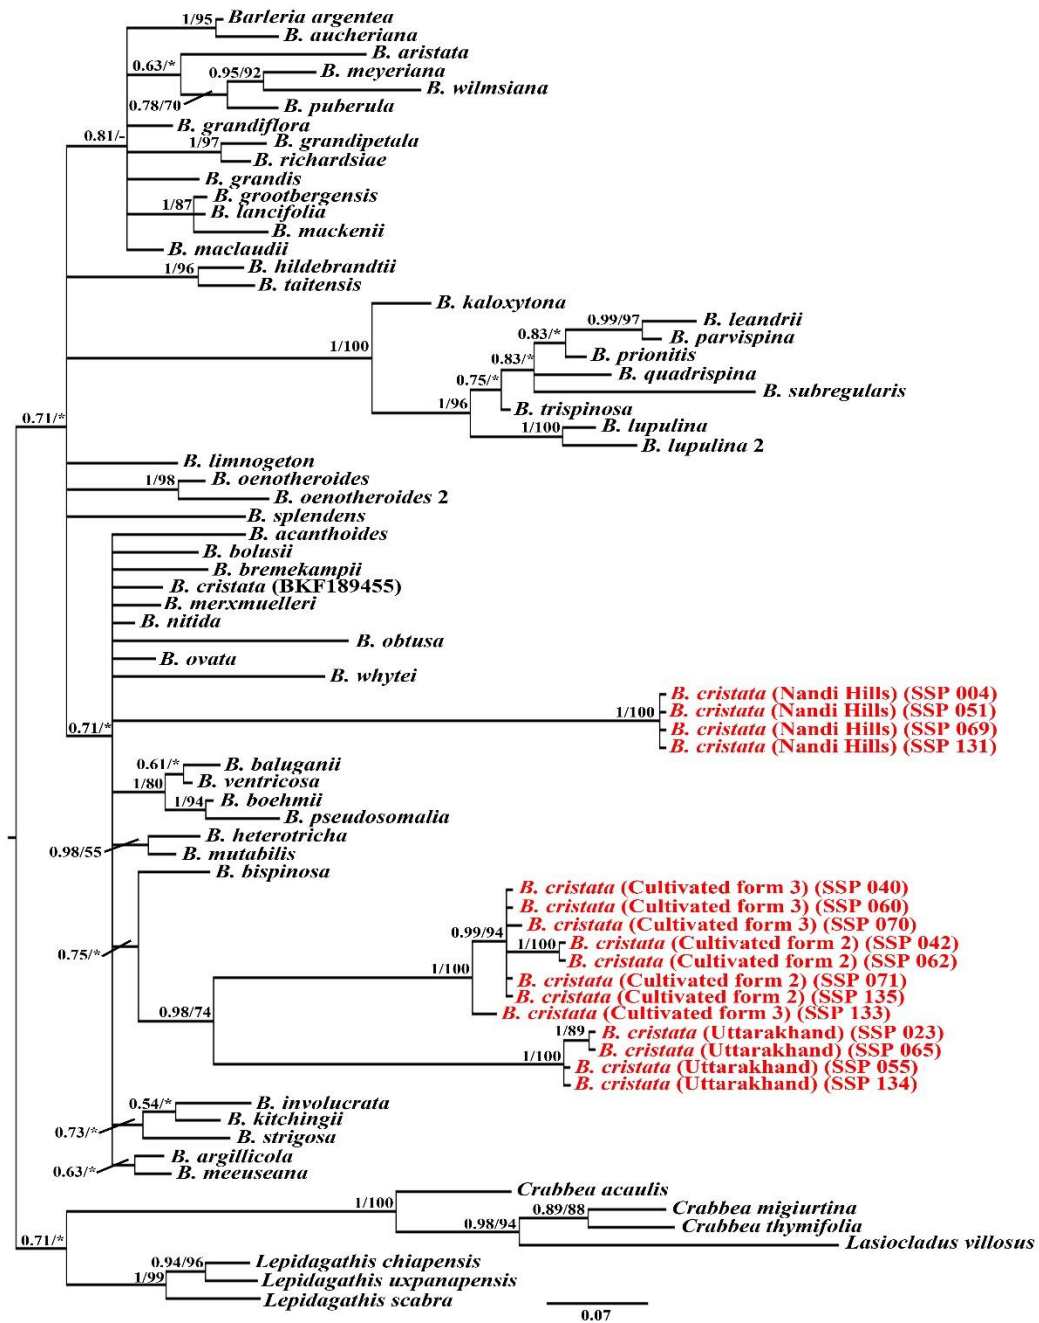

**Figure S1.** 50% Majority-rule consensus Bayesian phylogenetic tree based on ITS region. Bayesian posterior probability values and Maximum likelihood bootstrap values (BPP/ML BS) are provided above branches. Asterisk (\*) indicates ML BS values < 50%. The species sampled in this study are in red color and provided with their voucher specimen number in the bracket after the species name.
