# Supplementary material for: Morphology, Palynology and Molecular Phylogeny of Barleria cristata L. (Acanthaceae) Morphotypes from India
Source: MDPI journal article supplement (doi:10.3390/d14080677), 2022-08-19
Supplement: s1 [file s1]

**Table S2.** Estimate of average pairwise genetic distance among and within five morphotypes of *B. cristata* for *trnS*-G, *ndhF*-*trnL*<sub>(UAG)</sub> and ITS region.

| Morphotype name                                | Among morphotypes |                   |                   | Within morphotypes |             |        |
|------------------------------------------------|-------------------|-------------------|-------------------|--------------------|-------------|--------|
|                                                | Cultivated form 3 | Cultivated form 2 | Cultivated form 1 | Nandi Hills        | Uttarakhand | -      |
| <b><i>trnS</i>-G</b>                           |                   |                   |                   |                    |             |        |
| Cultivated form 3                              | -                 |                   |                   |                    |             | 0.0000 |
| Cultivated form 2                              | 0.00000           | -                 |                   |                    |             | 0.0000 |
| Cultivated form 1                              | 0.00000           | 0.00000           | -                 |                    |             | 0.0000 |
| Nandi Hills                                    | 0.00099           | 0.00143           | 0.00151           | -                  |             | 0.0036 |
| Uttarakhand                                    | 0.00054           | 0.00081           | 0.00081           | 0.00206            | -           | 0.0017 |
| <b><i>ndhF</i>-<i>trnL</i><sub>(UAG)</sub></b> |                   |                   |                   |                    |             |        |
| Cultivated form 3                              | -                 |                   |                   |                    |             | 0.0000 |
| Cultivated form 2                              | 0.000173          | -                 |                   |                    |             | 0.0004 |
| Cultivated form 1                              | 0.001396          | 0.001226          | -                 |                    |             | 0.0000 |
| Nandi Hills                                    | 0.000821          | 0.000915          | 0.002098          | -                  |             | 0.0003 |
| Uttarakhand                                    | 0.001393          | 0.001230          | 0.001404          | 0.002135           | -           | 0.0000 |
| <b>ITS</b>                                     |                   |                   |                   |                    |             |        |
| Cultivated form 3                              | -                 |                   | NA                |                    |             | 0.0007 |
| Cultivated form 2                              | 0.00805           | -                 | NA                |                    |             | 0.0018 |
| Nandi Hills                                    | 0.18423           | 0.19023           | NA                | -                  |             | 0.0073 |
| Uttarakhand                                    | 0.12962           | 0.13357           | NA                | 0.16470            | -           | 0.0067 |

**Note-** ITS sequences of cultivated form 1 morphotypes are missing. Hence, average pairwise genetic distance with remaining four morphotypes and genetic distance within morphotypes are not possible to calculate. NA- Not Applicable.
